# Supplementary material for: New Synthetic Isoxazole Derivatives Acting as Potent Inducers of Fetal Hemoglobin in Erythroid Precursor Cells Isolated from β-Thalassemic Patients
Source: MDPI journal article supplement (doi:10.3390/molecules29010008), 2023-12-19
Supplement: s1 [file s1]

Article

# New Synthetic Isoxazole Derivatives acting as potent Inducers of Fetal Hemoglobin in Erythroid Precursor Cells isolated from $\beta$ -Thalassemic Patients

Cristina Zuccato<sup>1,2</sup>, Lucia Carmela Cosenza <sup>1</sup>, Chiara Tupini,<sup>1</sup> Alessia Finotti,<sup>1</sup> Gianni Sacchetti,<sup>1</sup> Daniele Simoni,<sup>3</sup> Roberto Gambari<sup>1,2,\*</sup> and Ilaria Lampronti <sup>1,2\*</sup>

<sup>1</sup> Department of Life Sciences and Biotechnology, Section of Biochemistry and Molecular Biology, Ferrara University, 44121 Ferrara, Italy; [luciacarmela.cosenza@unife.it](mailto:luciacarmela.cosenza@unife.it) (L.C.C.); [cristina.zuccato@unife.it](mailto:cristina.zuccato@unife.it) (C.Z.); [alessia.finotti@unife.it](mailto:alessia.finotti@unife.it) (A.F.); [chiara.tupini@unife.it](mailto:chiara.tupini@unife.it) (C.T.)

<sup>2</sup> Center “Chiara Gemmo and Elio Zago” for the Research on Thalassemia, University of Ferrara, 44121 Ferrara, Italy; [gam@unife.it](mailto:gam@unife.it) (R.G.); [alessia.finotti@unife.it](mailto:alessia.finotti@unife.it) (A.F.); [ilaria.lampronti@unife.it](mailto:ilaria.lampronti@unife.it) (I.L.); [cristina.zuccato@unife.it](mailto:cristina.zuccato@unife.it) (C.Z.)

<sup>3</sup> Department of Chemical, Pharmaceutical and Agricultural sciences, Ferrara University, 44121 Ferrara, Italy; [daniele.simoni@unife.it](mailto:daniele.simoni@unife.it) (D.S.)

\* Correspondence: [ilaria.lampronti@unife.it](mailto:ilaria.lampronti@unife.it) (I.L.) Tel.: +390532-974509; [gam@unife.it](mailto:gam@unife.it) (R.G.) Tel.: +39-0532-974443

## Supplementary material

### HU

|      | <i>Salmonella typhimurium</i> TA97A |      |     |         |      |     | <i>Salmonella typhimurium</i> TA98 |      |      |         |      |     | <i>Salmonella typhimurium</i> TA100 |      |     |         |      |     | <i>Salmonella typhimurium</i> 1535 |      |     |         |      |     |
|------|-------------------------------------|------|-----|---------|------|-----|------------------------------------|------|------|---------|------|-----|-------------------------------------|------|-----|---------|------|-----|------------------------------------|------|-----|---------|------|-----|
|      | - S9                                |      |     | + S9    |      |     | - S9                               |      |      | + S9    |      |     | - S9                                |      |     | + S9    |      |     | - S9                               |      |     | + S9    |      |     |
|      | average                             | SD   | t/c | average | SD   | t/c | average                            | SD   | t/c  | average | SD   | t/c | average                             | SD   | t/c | average | SD   | t/c | average                            | SD   | t/c | average | SD   | t/c |
| DMSO | 108.0                               | 8.9  | 1.0 | 115.0   | 14.3 | 1.0 | 93.5                               | 2.5  | 1.0  | 79.2    | 4.0  | 1.0 | 109.2                               | 15.4 | 1.0 | 43.4    | 3.2  | 1.0 | 58.8                               | 4.8  | 1.0 | 58.0    | 11.8 | 1.0 |
| C+   | 351.0                               | 35.8 | 3.3 | 559.0   | 44.8 | 4.9 | 1054.7                             | 74.4 | 11.3 | 331.0   | 40.6 | 4.2 | 478.4                               | 26.9 | 4.4 | 285.0   | 5.4  | 2.9 | 220.1                              | 3.0  | 3.9 | 191.7   | 5.3  | 3.3 |
| 1    | 114.0                               | 5.2  | 1.1 | 93.0    | 6.9  | 0.8 | 88.0                               | 3.8  | 0.9  | 118.8   | 28.6 | 1.5 | 88.2                                | 12.8 | 0.8 | 97.1    | 9.8  | 1.0 | 84.0                               | 2.6  | 1.4 | 89.8    | 5.1  | 1.5 |
| 5    | 116.0                               | 20.0 | 1.1 | 80.5    | 11.4 | 0.7 | 78.1                               | 3.8  | 0.8  | 106.7   | 13.3 | 1.3 | 90.3                                | 11.1 | 0.8 | 109.7   | 21.2 | 1.1 | 76.7                               | 6.8  | 1.3 | 114.7   | 13.3 | 2.0 |
| 10   | 59.0                                | 6.9  | 0.5 | 68.0    | 0.9  | 0.6 | 93.5                               | 7.6  | 1.0  | 89.1    | 5.7  | 1.1 | 99.4                                | 17.0 | 0.9 | 87.7    | 5.4  | 0.9 | 89.5                               | 10.0 | 1.5 | 109.3   | 2.3  | 1.9 |
| 50   | 98.0                                | 49.5 | 0.9 | 98.0    | 7.5  | 0.9 | 95.7                               | 15.1 | 1.0  | 123.2   | 10.1 | 1.6 | 122.5                               | 11.6 | 1.1 | 134.7   | 11.8 | 1.4 | 73.7                               | 4.6  | 1.3 | 73.5    | 14.5 | 1.3 |
| 100  | 96.0                                | 3.0  | 0.9 | 62.0    | 3.8  | 0.5 | 78.1                               | 6.9  | 0.8  | 127.6   | 6.9  | 1.6 | 116.9                               | 2.4  | 1.1 | 153.5   | 33.3 | 1.6 | 59.0                               | 11.3 | 1.0 | 54.5    | 8.3  | 0.9 |

**Table S1.** Lack of genotoxic activity of Hydroxyurea (HU) at different concentrations (1, 5, 10, 50, 100  $\mu$ g/plate). All the t/c values were much lower than those obtained using a positive control (sodium azide, 1  $\mu$ g/plate).

## C1

|      | <i>Salmonella typhimurium</i> TA97A |      |     |         |      |     | <i>Salmonella typhimurium</i> TA98 |      |      |         |      |     | <i>Salmonella typhimurium</i> TA100 |      |     |         |      |     | <i>Salmonella typhimurium</i> 1535 |     |     |         |      |     |
|------|-------------------------------------|------|-----|---------|------|-----|------------------------------------|------|------|---------|------|-----|-------------------------------------|------|-----|---------|------|-----|------------------------------------|-----|-----|---------|------|-----|
|      | - S9                                |      |     | + S9    |      |     | - S9                               |      |      | + S9    |      |     | - S9                                |      |     | + S9    |      |     | - S9                               |     |     | + S9    |      |     |
|      | average                             | SD   | t/c | average | SD   | t/c | average                            | SD   | t/c  | average | SD   | t/c | average                             | SD   | t/c | average | SD   | t/c | average                            | SD  | t/c | average | SD   | t/c |
| DMSO | 108.0                               | 8.9  | 1.0 | 138.0   | 9.5  | 1.0 | 93.5                               | 8.3  | 1.0  | 79.2    | 13.2 | 1.0 | 109.2                               | 15.4 | 1.0 | 97.1    | 3.2  | 1.0 | 58.8                               | 4.8 | 1.0 | 58.0    | 11.8 | 1.0 |
| C+   | 351.0                               | 35.8 | 3.3 | 559.0   | 44.8 | 4.0 | 1054.7                             | 74.4 | 10.0 | 331.0   | 40.6 | 4.2 | 478.4                               | 26.9 | 4.4 | 285.0   | 5.4  | 2.9 | 220.1                              | 3.0 | 3.9 | 191.7   | 5.3  | 3.3 |
| 1    | 68.1                                | 27.2 | 0.6 | 151.2   | 14.7 | 1.1 | 67.1                               | 1.9  | 0.7  | 83.6    | 5.0  | 1.1 | 132.3                               | 4.2  | 1.2 | 126.9   | 16.3 | 1.3 | 42.5                               | 0.0 | 0.7 | 52.7    | 7.2  | 0.9 |
| 5    | 84.6                                | 9.0  | 0.8 | 165.0   | 22.4 | 1.2 | 53.9                               | 1.9  | 0.6  | 82.5    | 0.0  | 1.0 | 135.1                               | 2.4  | 1.2 | 111.2   | 10.9 | 1.1 | 30.8                               | 3.2 | 0.5 | 74.0    | 1.0  | 1.3 |
| 10   | 83.7                                | 17.6 | 0.8 | 157.8   | 3.7  | 1.1 | 70.4                               | 3.8  | 0.8  | 83.6    | 1.9  | 1.1 | 146.3                               | 17.1 | 1.3 | 125.3   | 15.1 | 1.3 | 31.7                               | 1.4 | 0.5 | 82.3    | 2.1  | 1.4 |
| 50   | 76.3                                | 16.5 | 0.7 | 145.8   | 4.8  | 1.1 | 62.7                               | 11.4 | 0.7  | 67.1    | 19.3 | 0.8 | 122.5                               | 5.3  | 1.1 | 103.4   | 18.8 | 1.1 | 50.3                               | 2.0 | 0.9 | 83.3    | 9.8  | 1.4 |
| 100  | 66.4                                | 6.0  | 0.6 | 132.6   | 15.5 | 1.0 | 53.9                               | 15.6 | 0.6  | 63.8    | 3.8  | 0.8 | 123.2                               | 17.5 | 1.1 | 139.4   | 5.4  | 1.4 | 39.8                               | 1.0 | 0.7 | 70.8    | 1.0  | 1.2 |

**Table S2.** Lack of genotoxic activity of **c1** at different concentrations (1, 5, 10, 50, 100 µg/plate). All the t/c values were much lower than those obtained using a positive control (sodium azide, 1 µg/plate).

## C2

|      | <i>Salmonella typhimurium</i> TA97A |      |     |         |      |     | <i>Salmonella typhimurium</i> TA98 |      |      |         |      |     | <i>Salmonella typhimurium</i> TA100 |      |     |         |      |     | <i>Salmonella typhimurium</i> 1535 |     |     |         |      |     |
|------|-------------------------------------|------|-----|---------|------|-----|------------------------------------|------|------|---------|------|-----|-------------------------------------|------|-----|---------|------|-----|------------------------------------|-----|-----|---------|------|-----|
|      | - S9                                |      |     | + S9    |      |     | - S9                               |      |      | + S9    |      |     | - S9                                |      |     | + S9    |      |     | - S9                               |     |     | + S9    |      |     |
|      | average                             | SD   | t/c | average | SD   | t/c | average                            | SD   | t/c  | average | SD   | t/c | average                             | SD   | t/c | average | SD   | t/c | average                            | SD  | t/c | average | SD   | t/c |
| DMSO | 102.0                               | 6.0  | 1.0 | 109.0   | 6.9  | 1.0 | 105.2                              | 4.0  | 1.0  | 137.4   | 4.7  | 1.0 | 109.2                               | 15.4 | 1.0 | 97.1    | 15.1 | 1.0 | 58.8                               | 4.8 | 1.0 | 58.0    | 11.8 | 1.0 |
| C+   | 351.0                               | 35.8 | 3.4 | 559.0   | 44.8 | 5.1 | 1054.7                             | 74.4 | 10.0 | 331.0   | 40.6 | 2.4 | 478.4                               | 26.9 | 4.4 | 285.0   | 5.4  | 2.9 | 220.1                              | 3.0 | 3.9 | 191.7   | 5.3  | 3.3 |
| 1    | 90.2                                | 5.2  | 0.9 | 112.1   | 32.9 | 1.0 | 143.5                              | 16.4 | 1.4  | 125.0   | 1.8  | 0.9 | 115.5                               | 3.6  | 1.1 | 87.7    | 7.2  | 0.9 | 31.0                               | 4.1 | 0.5 | 51.7    | 2.9  | 0.9 |
| 5    | 62.0                                | 4.6  | 0.6 | 99.0    | 37.5 | 0.9 | 97.0                               | 43.5 | 0.9  | 146.7   | 10.9 | 1.1 | 153.3                               | 15.9 | 1.4 | 87.7    | 17.8 | 0.9 | 37.8                               | 0.6 | 0.6 | 61.7    | 9.5  | 1.1 |
| 10   | 90.3                                | 9.0  | 0.9 | 125.5   | 14.2 | 1.1 | 143.5                              | 0.0  | 1.4  | 130.2   | 6.2  | 0.9 | 134.4                               | 23.4 | 1.2 | 78.3    | 26.7 | 0.8 | 37.2                               | 0.3 | 0.6 | 63.0    | 0.0  | 1.1 |
| 50   | 70.1                                | 4.6  | 0.7 | 149.4   | 20.0 | 1.4 | 139.4                              | 14.2 | 1.3  | 138.5   | 22.4 | 1.0 | 141.4                               | 2.4  | 1.3 | 72.1    | 16.5 | 0.7 | 39.5                               | 3.0 | 0.7 | 76.3    | 5.5  | 1.3 |
| 100  | 66.0                                | 13.7 | 0.6 | 141.0   | 7.9  | 1.3 | 214.6                              | 22.6 | 2.0  | 106.4   | 3.6  | 0.8 | 144.9                               | 17.2 | 1.3 | 70.5    | 12.4 | 0.7 | 21.7                               | 4.0 | 0.4 | 57.0    | 6.6  | 1.0 |

**Table S3.** Lack of genotoxic activity of **c2** at different concentrations (1, 5, 10, 50, 100 µg/plate). All the t/c values were much lower than those obtained using a positive control (sodium azide, 1 µg/plate).

### C3

|      | <i>Salmonella typhimurium</i> TA97A |      |     |         |      |     | <i>Salmonella typhimurium</i> TA98 |      |      |         |      |     | <i>Salmonella typhimurium</i> TA100 |      |     |         |      |     | <i>Salmonella typhimurium</i> 1535 |     |     |         |      |     |
|------|-------------------------------------|------|-----|---------|------|-----|------------------------------------|------|------|---------|------|-----|-------------------------------------|------|-----|---------|------|-----|------------------------------------|-----|-----|---------|------|-----|
|      | - S9                                |      |     | + S9    |      |     | - S9                               |      |      | + S9    |      |     | - S9                                |      |     | + S9    |      |     | - S9                               |     |     | + S9    |      |     |
|      | average                             | SD   | t/c | average | SD   | t/c | average                            | SD   | t/c  | average | SD   | t/c | average                             | SD   | t/c | average | SD   | t/c | average                            | SD  | t/c | average | SD   | t/c |
| DMSO | 102.0                               | 6.0  | 1.0 | 109.0   | 6.9  | 1.0 | 105.2                              | 4.0  | 1.0  | 137.4   | 4.7  | 1.0 | 109.2                               | 15.4 | 1.0 | 97.1    | 15.1 | 1.0 | 58.8                               | 4.8 | 1.0 | 58.0    | 11.8 | 1.0 |
| C+   | 351.0                               | 35.8 | 3.4 | 559.0   | 44.8 | 5.1 | 1054.7                             | 74.4 | 10.0 | 331.0   | 40.6 | 2.4 | 478.4                               | 26.9 | 4.4 | 285.0   | 5.4  | 2.9 | 220.1                              | 3.0 | 3.9 | 191.7   | 5.3  | 3.3 |
| 1    | 190.0                               | 17.1 | 1.8 | 85.4    | 18.3 | 0.8 | 121.6                              | 17.1 | 1.2  | 150.9   | 7.8  | 1.1 | 85.4                                | 2.4  | 0.8 | 84.6    | 12.4 | 0.9 | 53.7                               | 1.2 | 0.9 | 40.7    | 1.5  | 0.7 |
| 5    | 197.2                               | 22.7 | 1.9 | 88.0    | 13.9 | 0.8 | 108.0                              | 12.5 | 1.0  | 132.3   | 7.8  | 1.0 | 137.9                               | 9.5  | 1.3 | 81.5    | 9.8  | 0.9 | 41.7                               | 1.4 | 0.7 | 66.7    | 9.2  | 1.1 |
| 10   | 173.6                               | 13.9 | 1.7 | 102.6   | 15.9 | 0.9 | 110.7                              | 18.8 | 1.1  | 139.5   | 37.6 | 1.0 | 135.1                               | 2.4  | 1.2 | 90.9    | 28.7 | 1.0 | 37.3                               | 4.6 | 0.6 | 51.0    | 5.3  | 0.9 |
| 50   | 170.6                               | 17.6 | 1.7 | 104.2   | 6.9  | 0.9 | 132.6                              | 10.3 | 1.3  | 124.0   | 3.1  | 0.9 | 138.6                               | 5.6  | 1.3 | 103.4   | 12.4 | 1.1 | 29.5                               | 2.3 | 0.5 | 57.3    | 0.6  | 1.0 |
| 100  | 166.5                               | 32.9 | 1.6 | 82.2    | 1.7  | 0.8 | 102.5                              | 8.2  | 1.0  | 132.3   | 1.8  | 1.0 | 137.2                               | 1.2  | 1.3 | 70.5    | 12.4 | 0.7 | 49.8                               | 0.6 | 0.8 | 52.0    | 5.6  | 0.9 |

**Table S4.** Lack of genotoxic activity of **c3** at different concentrations (1, 5, 10, 50, 100 µg/plate). All the t/c values were much lower than those obtained using a positive control (sodium azide, 1 µg/plate).

### C4

|      | <i>Salmonella typhimurium</i> TA97A |      |     |         |      |     | <i>Salmonella typhimurium</i> TA98 |      |      |         |      |     | <i>Salmonella typhimurium</i> TA100 |      |     |         |      |     | <i>Salmonella typhimurium</i> 1535 |      |     |         |      |     |
|------|-------------------------------------|------|-----|---------|------|-----|------------------------------------|------|------|---------|------|-----|-------------------------------------|------|-----|---------|------|-----|------------------------------------|------|-----|---------|------|-----|
|      | - S9                                |      |     | + S9    |      |     | - S9                               |      |      | + S9    |      |     | - S9                                |      |     | + S9    |      |     | - S9                               |      |     | + S9    |      |     |
|      | average                             | SD   | t/c | average | SD   | t/c | average                            | SD   | t/c  | average | SD   | t/c | average                             | SD   | t/c | average | SD   | t/c | average                            | SD   | t/c | average | SD   | t/c |
| DMSO | 108.0                               | 8.9  | 1.0 | 138.0   | 9.5  | 1.0 | 93.5                               | 8.3  | 1.0  | 79.2    | 13.2 | 1.0 | 109.2                               | 15.4 | 1.0 | 97.1    | 3.2  | 1.0 | 58.8                               | 4.8  | 1.0 | 58.0    | 11.8 | 1.0 |
| C+   | 351.0                               | 35.8 | 3.3 | 559.0   | 44.8 | 4.0 | 1054.7                             | 74.4 | 11.3 | 331.0   | 40.6 | 4.2 | 478.4                               | 26.9 | 4.4 | 285.0   | 5.4  | 2.9 | 220.1                              | 3.0  | 3.9 | 191.7   | 5.3  | 3.3 |
| 1    | 100.3                               | 20.4 | 0.9 | 129.0   | 14.5 | 0.9 | 63.8                               | 3.8  | 0.7  | 73.7    | 3.8  | 0.9 | 97.3                                | 2.4  | 0.9 | 120.6   | 19.6 | 1.2 | 49.5                               | 5.5  | 0.8 | 75.8    | 14.1 | 1.3 |
| 5    | 108.7                               | 18.0 | 1.0 | 144.0   | 8.2  | 1.0 | 57.2                               | 15.2 | 0.6  | 68.2    | 21.0 | 0.9 | 91.0                                | 1.2  | 0.8 | 119.1   | 17.8 | 1.2 | 70.8                               | 14.9 | 1.2 | 41.2    | 4.3  | 0.7 |
| 10   | 97.0                                | 14.2 | 0.9 | 148.2   | 5.8  | 1.1 | 50.6                               | 24.8 | 0.5  | 135.3   | 34.9 | 1.7 | 104.3                               | 17.6 | 1.0 | 139.4   | 2.7  | 1.4 | 64.0                               | 10.5 | 1.1 | 48.0    | 5.2  | 0.8 |
| 50   | 82.6                                | 22.5 | 0.8 | 151.2   | 26.5 | 1.1 | 45.1                               | 3.8  | 0.5  | 115.5   | 5.7  | 1.5 | 109.9                               | 11.6 | 1.0 | 158.2   | 11.8 | 1.6 | 73.5                               | 0.5  | 1.2 | 51.0    | 8.2  | 0.9 |
| 100  | 83.1                                | 20.4 | 0.8 | 138.6   | 12.5 | 1.0 | 40.7                               | 10.6 | 0.4  | 119.9   | 3.8  | 1.5 | 105.0                               | 8.4  | 1.0 | 115.9   | 17.8 | 1.2 | 77.2                               | 13.1 | 1.3 | 48.2    | 8.0  | 0.8 |

**Table S5.** Lack of genotoxic activity of **c4** at different concentrations (1, 5, 10, 50, 100 µg/plate). All the t/c values were much lower than those obtained using a positive control (sodium azide, 1 µg/plate).

## C5

|      | <i>Salmonella typhimurium</i> TA97A |      |     |         |      |     | <i>Salmonella typhimurium</i> TA98 |      |      |         |      |     | <i>Salmonella typhimurium</i> TA100 |      |     |         |      |     | <i>Salmonella typhimurium</i> 1535 |      |     |         |      |     |
|------|-------------------------------------|------|-----|---------|------|-----|------------------------------------|------|------|---------|------|-----|-------------------------------------|------|-----|---------|------|-----|------------------------------------|------|-----|---------|------|-----|
|      | - S9                                |      |     | + S9    |      |     | - S9                               |      |      | + S9    |      |     | - S9                                |      |     | + S9    |      |     | - S9                               |      |     | + S9    |      |     |
|      | average                             | SD   | t/c | average | SD   | t/c | average                            | SD   | t/c  | average | SD   | t/c | average                             | SD   | t/c | average | SD   | t/c | average                            | SD   | t/c | average | SD   | t/c |
| DMSO | 102.0                               | 6.0  | 1.0 | 109.0   | 6.9  | 1.0 | 105.2                              | 4.0  | 1.0  | 137.4   | 4.7  | 1.0 | 109.2                               | 15.4 | 1.0 | 97.1    | 15.1 | 1.0 | 58.8                               | 4.8  | 1.0 | 58.0    | 11.8 | 1.0 |
| C+   | 351.0                               | 35.8 | 3.4 | 559.0   | 44.8 | 5.1 | 1054.7                             | 74.4 | 10.0 | 331.0   | 40.6 | 2.4 | 478.4                               | 26.9 | 4.4 | 285.0   | 5.4  | 2.9 | 220.1                              | 3.0  | 3.9 | 191.7   | 5.3  | 3.3 |
| 1    | 109.1                               | 36.7 | 1.1 | 155.1   | 3.5  | 1.4 | 132.6                              | 8.5  | 1.3  | 126.1   | 10.9 | 0.9 | 135.8                               | 3.2  | 1.2 | 73.6    | 5.4  | 0.8 | 47.3                               | 1.8  | 0.8 | 54.2    | 1.6  | 0.9 |
| 5    | 87.9                                | 6.9  | 0.9 | 151.2   | 11.4 | 1.4 | 129.8                              | 9.5  | 1.2  | 139.5   | 16.1 | 1.0 | 122.5                               | 3.2  | 1.1 | 109.7   | 17.8 | 1.1 | 47.3                               | 2.3  | 0.8 | 62.7    | 5.9  | 1.1 |
| 10   | 86.5                                | 1.7  | 0.8 | 177.4   | 20.8 | 1.6 | 121.6                              | 9.5  | 1.2  | 107.5   | 4.7  | 0.8 | 123.9                               | 7.3  | 1.1 | 98.7    | 9.4  | 1.0 | 51.3                               | 6.8  | 0.9 | 55.5    | 2.6  | 1.0 |
| 50   | 76.0                                | 1.7  | 0.7 | 133.0   | 7.5  | 1.2 | 120.3                              | 22.6 | 1.1  | 151.9   | 0.0  | 1.1 | 126.7                               | 15.8 | 1.2 | 70.5    | 0.0  | 0.7 | 64.5                               | 11.8 | 1.1 | 50.3    | 1.4  | 0.9 |
| 100  | 92.4                                | 1.7  | 0.9 | 90.3    | 6.0  | 0.8 | 131.2                              | 7.1  | 1.2  | 156.0   | 14.3 | 1.1 | 113.4                               | 5.6  | 1.0 | 78.3    | 2.7  | 0.8 | 38.2                               | 0.6  | 0.6 | 57.7    | 3.0  | 1.0 |

**Table S6.** Lack of genotoxic activity of **c5** at different concentrations (1, 5, 10, 50, 100 µg/plate). All the t/c values were much lower than those obtained using a positive control (sodium azide, 1 µg/plate).

## C6

|      | <i>Salmonella typhimurium</i> TA97A |      |     |         |      |     | <i>Salmonella typhimurium</i> TA98 |      |      |         |      |     | <i>Salmonella typhimurium</i> TA100 |      |     |         |      |     | <i>Salmonella typhimurium</i> 1535 |      |     |         |      |     |
|------|-------------------------------------|------|-----|---------|------|-----|------------------------------------|------|------|---------|------|-----|-------------------------------------|------|-----|---------|------|-----|------------------------------------|------|-----|---------|------|-----|
|      | - S9                                |      |     | + S9    |      |     | - S9                               |      |      | + S9    |      |     | - S9                                |      |     | + S9    |      |     | - S9                               |      |     | + S9    |      |     |
|      | average                             | SD   | t/c | average | SD   | t/c | average                            | SD   | t/c  | average | SD   | t/c | average                             | SD   | t/c | average | SD   | t/c | average                            | SD   | t/c | average | SD   | t/c |
| DMSO | 102.0                               | 6.6  | 1.0 | 144.5   | 17.8 | 1.0 | 90.3                               | 7.6  | 1.0  | 82.0    | 7.0  | 1.0 | 112.7                               | 6.0  | 1.0 | 136.9   | 14.8 | 1.0 | 55.8                               | 6.5  | 1.0 | 65.8    | 10.4 | 1.0 |
| C+   | 351.0                               | 35.8 | 3.4 | 559.0   | 44.8 | 3.9 | 1054.7                             | 74.4 | 11.7 | 331.0   | 40.6 | 4.0 | 478.4                               | 26.9 | 4.2 | 285.0   | 5.4  | 2.1 | 220.1                              | 3.0  | 3.9 | 191.7   | 5.3  | 2.9 |
| 1    | 74.0                                | 18.3 | 0.7 | 165.0   | 5.4  | 1.2 | 65.8                               | 16.8 | 0.7  | 86.7    | 3.1  | 1.1 | 127.4                               | 6.1  | 1.1 | 107.3   | 6.4  | 0.8 | 67.3                               | 0.6  | 1.2 | 77.2    | 16.3 | 1.2 |
| 5    | 133.1                               | 3.1  | 1.3 | 192.2   | 11.3 | 1.3 | 83.3                               | 8.7  | 0.9  | 81.0    | 11.1 | 1.0 | 115.5                               | 3.6  | 1.0 | 148.0   | 6.4  | 1.1 | 65.5                               | 3.5  | 1.2 | 73.0    | 2.0  | 1.1 |
| 10   | 179.3                               | 9.0  | 1.8 | 157.1   | 25.7 | 1.2 | 75.6                               | 12.8 | 0.8  | 75.0    | 2.0  | 0.9 | 138.6                               | 3.6  | 1.2 | 169.0   | 28.0 | 1.2 | 85.0                               | 14.7 | 1.5 | 73.8    | 6.8  | 1.1 |
| 50   | 152.8                               | 14.0 | 1.5 | 128.0   | 16.5 | 0.9 | 73.5                               | 16.4 | 0.8  | 66.3    | 0.6  | 0.8 | 144.9                               | 7.6  | 1.3 | 231.9   | 20.4 | 1.7 | 65.2                               | 2.0  | 1.2 | 67.7    | 1.2  | 1.0 |
| 100  | 99.3                                | 14.7 | 1.0 | 90.3    | 8.4  | 0.6 | 100.1                              | 4.4  | 1.1  | 19.7    | 4.9  | 0.2 | 146.3                               | 4.8  | 1.3 | 169.0   | 29.9 | 1.2 | 70.3                               | 9.1  | 1.3 | 78.3    | 4.6  | 1.2 |

**Table S7.** Lack of genotoxic activity of **c6** at different concentrations (1, 5, 10, 50, 100 µg/plate). All the t/c values were much lower than those obtained using a positive control (sodium azide, 1 µg/plate).

C7

|      | <i>Salmonella typhimurium</i> TA97A |      |     |         |      |     | <i>Salmonella typhimurium</i> TA98 |      |      |         |      |     | <i>Salmonella typhimurium</i> TA100 |      |     |         |      |     | <i>Salmonella typhimurium</i> 1535 |     |     |         |      |     |
|------|-------------------------------------|------|-----|---------|------|-----|------------------------------------|------|------|---------|------|-----|-------------------------------------|------|-----|---------|------|-----|------------------------------------|-----|-----|---------|------|-----|
|      | - S9                                |      |     | + S9    |      |     | - S9                               |      |      | + S9    |      |     | - S9                                |      |     | + S9    |      |     | - S9                               |     |     | + S9    |      |     |
|      | average                             | SD   | t/c | average | SD   | t/c | average                            | SD   | t/c  | average | SD   | t/c | average                             | SD   | t/c | average | SD   | t/c | average                            | SD  | t/c | average | SD   | t/c |
| DMSO | 102.0                               | 6.6  | 1.0 | 144.5   | 17.8 | 1.0 | 90.3                               | 7.6  | 1.0  | 82.0    | 7.0  | 1.0 | 112.7                               | 6.0  | 1.0 | 136.9   | 14.8 | 1.0 | 55.8                               | 6.5 | 1.0 | 65.8    | 10.4 | 1.0 |
| C+   | 351.0                               | 35.8 | 3.4 | 559.0   | 44.8 | 3.9 | 1054.7                             | 74.4 | 11.7 | 331.0   | 40.6 | 4.0 | 478.4                               | 26.9 | 4.2 | 285.0   | 5.4  | 2.1 | 220.1                              | 3.0 | 3.9 | 191.7   | 5.3  | 2.9 |
| 1    | 87.3                                | 4.6  | 0.9 | 130.5   | 10.5 | 0.9 | 81.2                               | 5.3  | 0.9  | 70.7    | 5.8  | 0.9 | 191.1                               | 12.8 | 1.7 | 141.8   | 20.4 | 1.0 | 76.8                               | 8.6 | 1.4 | 83.7    | 17.2 | 1.3 |
| 5    | 93.3                                | 3.1  | 0.9 | 118.0   | 13.9 | 0.8 | 68.6                               | 12.3 | 0.8  | 84.3    | 8.5  | 1.0 | 174.3                               | 15.1 | 1.5 | 99.9    | 6.4  | 0.7 | 76.3                               | 6.0 | 1.4 | 95.0    | 10.8 | 1.4 |
| 10   | 102.7                               | 4.2  | 1.0 | 112.0   | 10.2 | 0.8 | 70.0                               | 15.8 | 0.8  | 84.7    | 17.9 | 1.0 | 179.2                               | 20.7 | 1.6 | 156.6   | 7.7  | 1.1 | 72.8                               | 7.8 | 1.3 | 74.0    | 13.0 | 1.1 |
| 50   | 131.3                               | 8.1  | 1.3 | 76.5    | 1.5  | 0.5 | 77.7                               | 4.2  | 0.9  | 65.3    | 5.0  | 0.8 | 157.5                               | 0.0  | 1.4 | 144.3   | 0.0  | 1.1 | 74.8                               | 1.2 | 1.3 | 87.7    | 2.5  | 1.3 |
| 100  | 108.0                               | 5.3  | 1.1 | 78.5    | 17.9 | 0.5 | 78.4                               | 1.2  | 0.9  | 103.3   | 16.0 | 1.3 | 158.9                               | 6.1  | 1.4 | 169.0   | 59.8 | 1.2 | 71.2                               | 5.6 | 1.3 | 83.2    | 1.6  | 1.3 |

**Table S8.** Lack of genotoxic activity of **c7** at different concentrations (1, 5, 10, 50, 100 µg/plate). All the t/c values were much lower than those obtained using a positive control (sodium azide, 1 µg/plate).

C8

|      | <i>Salmonella typhimurium</i> TA97A |      |     |         |      |     | <i>Salmonella typhimurium</i> TA98 |      |      |         |      |     | <i>Salmonella typhimurium</i> TA100 |      |     |         |      |     | <i>Salmonella typhimurium</i> 1535 |     |     |         |      |     |
|------|-------------------------------------|------|-----|---------|------|-----|------------------------------------|------|------|---------|------|-----|-------------------------------------|------|-----|---------|------|-----|------------------------------------|-----|-----|---------|------|-----|
|      | - S9                                |      |     | + S9    |      |     | - S9                               |      |      | + S9    |      |     | - S9                                |      |     | + S9    |      |     | - S9                               |     |     | + S9    |      |     |
|      | average                             | SD   | t/c | average | SD   | t/c | average                            | SD   | t/c  | average | SD   | t/c | average                             | SD   | t/c | average | SD   | t/c | average                            | SD  | t/c | average | SD   | t/c |
| DMSO | 102.0                               | 6.6  | 1.0 | 136.7   | 15.0 | 1.0 | 90.3                               | 7.6  | 1.0  | 82.0    | 7.0  | 1.0 | 112.7                               | 6.0  | 1.0 | 136.9   | 14.8 | 1.0 | 55.8                               | 6.5 | 1.0 | 65.8    | 10.4 | 1.0 |
| C+   | 351.0                               | 35.8 | 3.4 | 559.0   | 44.8 | 4.1 | 1054.7                             | 74.4 | 11.7 | 331.0   | 40.6 | 4.0 | 478.4                               | 26.9 | 4.2 | 285.0   | 5.4  | 2.1 | 220.1                              | 3.0 | 3.9 | 191.7   | 5.3  | 2.9 |
| 1    | 84.7                                | 5.8  | 0.8 | 168.2   | 39.3 | 1.2 | 58.8                               | 5.6  | 0.7  | 73.3    | 2.9  | 0.9 | 98.7                                | 9.2  | 0.9 | 119.6   | 22.3 | 0.9 | 60.3                               | 9.5 | 1.1 | 71.8    | 15.1 | 1.1 |
| 5    | 77.3                                | 1.2  | 0.8 | 141.2   | 11.1 | 1.0 | 68.6                               | 16.0 | 0.8  | 72.0    | 0.0  | 0.9 | 101.5                               | 3.2  | 0.9 | 129.5   | 3.7  | 0.9 | 61.7                               | 1.2 | 1.1 | 60.7    | 4.5  | 0.9 |
| 10   | 71.2                                | 4.6  | 0.7 | 127.7   | 6.7  | 0.9 | 156.8                              | 1.2  | 1.7  | 44.3    | 4.0  | 0.5 | 98.7                                | 18.7 | 0.9 | 161.6   | 11.9 | 1.2 | 72.3                               | 1.2 | 1.3 | 72.2    | 11.6 | 1.1 |
| 50   | 72.0                                | 3.5  | 0.7 | 127.3   | 19.2 | 0.9 | 107.1                              | 7.3  | 1.2  | 83.3    | 19.4 | 1.0 | 106.4                               | 10.4 | 0.9 | 152.9   | 18.3 | 1.1 | 47.3                               | 0.6 | 0.8 | 61.7    | 10.4 | 0.9 |
| 100  | 103.7                               | 7.0  | 1.0 | 124.3   | 5.5  | 0.9 | 81.9                               | 4.2  | 0.9  | 86.7    | 9.3  | 1.1 | 140.7                               | 2.1  | 1.2 | 319.4   | 20.4 | 2.3 | 50.2                               | 2.9 | 0.9 | 72.8    | 0.3  | 1.1 |

**Table S9.** Lack of genotoxic activity of **c8** at different concentrations (1, 5, 10, 50, 100 µg/plate). All the t/c values were much lower than those obtained using a positive control (sodium azide, 1 µg/plate).

|                                | <b>HU</b> | <b>C1</b> | <b>C2</b> | <b>C3</b> | <b>C4</b> | <b>C5</b> | <b>C6</b> | <b>C7</b> | <b>C8</b> |
|--------------------------------|-----------|-----------|-----------|-----------|-----------|-----------|-----------|-----------|-----------|
| ( $\mu\text{g}/\text{plate}$ ) | (mM)      |
| <b>1</b>                       | 0.0333    | 0.0224    | 0.0228    | 0.0257    | 0.0290    | 0.0233    | 0.0226    | 0.0217    | 0.0206    |
| <b>5</b>                       | 0.1665    | 0.1120    | 0.1138    | 0.1284    | 0.1448    | 0.1164    | 0.1130    | 0.1083    | 0.1029    |
| <b>10</b>                      | 0.3330    | 0.2240    | 0.2276    | 0.2568    | 0.2895    | 0.2328    | 0.2260    | 0.2165    | 0.2058    |
| <b>50</b>                      | 1.6650    | 1.1198    | 1.1378    | 1.2839    | 1.4476    | 1.1642    | 1.1301    | 1.0826    | 1.0292    |
| <b>100</b>                     | 3.3300    | 2.2396    | 2.2755    | 2.5677    | 2.8953    | 2.3283    | 2.2603    | 2.1652    | 2.0585    |

**Table S10.** Concentrations tested for all the samples (1, 5, 10, 50, 100  $\mu\text{g}/\text{plate}$ ) related to the respective molar concentrations.
